# Supplementary material for: Discovery of archaeal fusexins homologous to eukaryotic HAP2/GCS1 gamete fusion proteins
Source: PubMed Central journal article supplement (PMC9259645; doi:10.1038/s41467-022-31564-1), 2022-07-06
Supplement: 41467_2022_31564_MOESM2_ESM.pdf [file 41467_2022_31564_MOESM2_ESM.pdf]

**Title:** Supplementary Movie 1

**Description:** Time-lapse experiment using spinning disk confocal microscopy reveals merging of two cells expressing myr-mCherry and Fsx1. Time in hours:minutes. Merge of the red and DIC channels is shown.

**Title:** Supplementary Movie 2

**Description:** Z-series of the binucleated BHK cell from Fig. 4h. Labeled nuclei (blue) and myr-mCherry (white). Each optical section obtained with spinning disc confocal microscopy is 1  $\mu\text{m}$  apart.

**Title:** Supplementary Data 1

**Description:** This table contains a complete list of the Fsx1-encoding genes identified in this study with ID, amino acid sequence and associated environmental and genomic data.

**Title:** Supplementary Data 2

**Description:** This table contains a complete list of PCGs' IME ORFs annotated with identified Pfam, TIGR and arCOGs domains.

**Title:** Supplementary Data 3

**Description:** This table contains a complete list of the 11 IME ORFs (as shown in Fig. 8) annotated with identified arCOGs domains.

**Title:** Supplementary Data 4.

**Description:** This file contains the sequences of the ten fsx1s genes synthesized for expression tests and fusogenic activities.

**Title:** Supplementary Data 5.

**Description:** This file contains the Fsx1 HAP2 tree in newick format with branch support values.
